# Supplementary material
Source: PubMed Central journal article supplement (PMC8486322)
Supplement: NIHMS1739506-supplement-tables.pdf [file NIHMS1739506-supplement-tables.pdf]

**Cell, Volume 176**

**Supplemental Information**

**Regulation of HIV-1 Gag-Pol Expression**

**by Shiftless, an Inhibitor of**

**Programmed -1 Ribosomal Frameshifting**

**Xinlu Wang, Yifang Xuan, Yuling Han, Xiang Ding, Kai Ye, Fuquan Yang, Pu Gao, Stephen P. Goff, and Guangxia Gao**

**Table S1. ISGs screened for activity to inhibit HIV-1 -1PRF. Related to Figure 1.**

| Gene Name    | Relative -1PRF efficiency | Gene Name | Relative -1PR efficiency | Gene Name | Relative -1PRF efficiency | Gene Name | Relative -1PRF efficiency |
|--------------|---------------------------|-----------|--------------------------|-----------|---------------------------|-----------|---------------------------|
| Empty Vector | 100.0                     | XRN2      | 88.3                     | CREM      | 99.9                      | APOL6     | 108.8                     |
| C19orf66     | 53.5                      | TEAD4     | 88.4                     | B3GNT2    | 100.5                     | IFI44     | 109.1                     |
| FAM122C      | 70.3                      | FTSJD2    | 89.0                     | NAPSA     | 100.8                     | GBP4      | 109.6                     |
| ASPHD2       | 70.4                      | PLAC8     | 89.2                     | RUNX3     | 100.9                     | LGALS3BP  | 109.8                     |
| IER3         | 73.2                      | CASP4     | 90.6                     | LMO2      | 101.5                     | FNDCC5    | 110.5                     |
| AGPAT4       | 74.3                      | C14orf149 | 90.9                     | RNF213    | 101.8                     | RTP4      | 111.6                     |
| MC3R         | 74.7                      | ARHGAP25  | 91.2                     | CKB       | 102.2                     | NPC2      | 111.7                     |
| CASP10       | 76.0                      | RNASET2   | 91.3                     | IFI27     | 102.5                     | TMEM140   | 111.8                     |
| LHFPL1       | 77.2                      | MSMB      | 91.7                     | CCDC146   | 102.5                     | SP140     | 111.8                     |
| MYO5C        | 77.8                      | GSDMD     | 92.5                     | EPSTI1    | 102.8                     | GSN       | 112.7                     |
| FRMD3        | 79.0                      | SLAMF8    | 94.3                     | ST3GAL    | 103.0                     | TRIM31    | 113.8                     |
| GALM         | 80.0                      | BOC       | 94.9                     | NPHP1     | 103.0                     | GLYATL1   | 115.4                     |
| ETV4         | 81.2                      | TNFRSF1A  | 95.0                     | MFN1      | 103.0                     | IFI44L    | 116.0                     |
| BRWD1        | 81.4                      | RNF149    | 95.0                     | MR1       | 103.0                     | SELL      | 116.9                     |
| TMEM229B     | 81.7                      | PDE6H     | 96.0                     | REC8      | 104.4                     | CD69      | 118.5                     |
| C1orf38      | 81.8                      | XRN1      | 96.2                     | TMEM45B   | 104.6                     | IFIT5     | 120.2                     |
| ENDOD1       | 81.9                      | SLC38A5   | 96.2                     | IDH1      | 104.6                     | INPP1     | 120.8                     |
| CD164        | 82.4                      | C20orf103 | 96.4                     | PDS5A     | 104.7                     | IFI6      | 123.2                     |
| PHLDA2       | 82.9                      | MOXD1     | 97.1                     | MGC87042  | 105.4                     | DDAH2     | 123.5                     |
| TOR1B        | 83.9                      | MS4A12    | 97.4                     | DCLRE1C   | 105.5                     | MX2       | 126.4                     |
| TMEM106A     | 84.2                      | BCL2A1    | 97.8                     | FAM109B   | 105.7                     | DDX60L    | 127.3                     |
| GPR84        | 85.7                      | NEXN      | 97.9                     | EGR1      | 106.7                     | CXorf21   | 129.0                     |
| PARP3        | 87.4                      | AZU1      | 98.0                     | USP18     | 107.2                     | XAF1      | 132.1                     |
| TPPP2        | 88.1                      | SNX9      | 98.3                     | ENTPD1    | 107.2                     | FCGR2C    | 134.4                     |
| FGD2         | 88.3                      | RASGRP3   | 99.1                     | TIMD4     | 107.6                     | PIM1      | 140.4                     |

The dual-luciferase reporter pDual-HIV(-1) was transfected into 293T cells together with an empty vector or a plasmid expressing an ISG. At 36 h posttransfection, luciferase activities were measured. The Fluc/Rluc ratio reflects the -1PRF efficiency. The relative -1PRF efficiency in the cells transfected with the empty vector was set as 100.

**Table S2. Raw data of Figure 2A.** Related to Figure 2.

| EXP1      | EV    |       |               | Flag-SFL |       |               |
|-----------|-------|-------|---------------|----------|-------|---------------|
|           | Fluc  | Rluc  | Fluc/Rluc*100 | Fluc     | Rluc  | Fluc/Rluc*100 |
| HIV-1(0)  | 1600  | 4344  | 36.8          | 852.7    | 2674  | 31.9          |
| HIV-1(-1) | 105.2 | 5080  | 2.07          | 38.94    | 3915  | 0.99          |
| RSV       | 28.08 | 4336  | 0.65          | 8.743    | 4034  | 0.22          |
| HTLV      | 171   | 8814  | 1.94          | 47.11    | 6251  | 0.75          |
| MMTV      | 450.2 | 8872  | 5.07          | 95.90    | 4655  | 2.06          |
| HIV-2     | 99.71 | 6893  | 1.45          | 23.54    | 6184  | 0.38          |
| SIV       | 108.1 | 6333  | 1.71          | 48.65    | 8007  | 0.61          |
| SINV      | 59.82 | 1641  | 3.65          | 18.73    | 1941  | 0.96          |
| PEG10     | 486.4 | 6454  | 7.54          | 106.7    | 3625  | 2.94          |
| CCR5      | 4.934 | 134.0 | 3.68          | 4.713    | 304.6 | 1.55          |

  

| EXP2      | EV    |       |               | Flag-SFL |       |               |
|-----------|-------|-------|---------------|----------|-------|---------------|
|           | Fluc  | Rluc  | Fluc/Rluc*100 | Fluc     | Rluc  | Fluc/Rluc*100 |
| HIV-1(0)  | 1191  | 3089  | 38.56         | 633.6    | 1841  | 34.4          |
| HIV-1(-1) | 100.8 | 4361  | 2.31          | 35.67    | 3671  | 0.97          |
| RSV       | 13.34 | 1424  | 0.94          | 4.704    | 1477  | 0.32          |
| HTLV      | 157.6 | 7896  | 2.00          | 42.18    | 6438  | 0.66          |
| MMTV      | 487.8 | 9256  | 5.27          | 158.4    | 7528  | 2.10          |
| HIV-2     | 65.88 | 4436  | 1.49          | 24.67    | 6648  | 0.37          |
| SIV       | 101.9 | 5659  | 1.80          | 56.70    | 9564  | 0.59          |
| SINV      | 46.94 | 1112  | 4.22          | 15.72    | 1947  | 0.81          |
| PEG10     | 575.8 | 8214  | 7.01          | 140.0    | 5759  | 2.43          |
| CCR5      | 4.242 | 106.0 | 4.00          | 3.666    | 187.0 | 1.96          |

  

| EXP3      | EV    |       |               | Flag-SFL |       |               |
|-----------|-------|-------|---------------|----------|-------|---------------|
|           | Fluc  | Rluc  | Fluc/Rluc*100 | Fluc     | Rluc  | Fluc/Rluc*100 |
| HIV-1(0)  | 343.5 | 910.2 | 37.74         | 151.4    | 463.0 | 32.70         |
| HIV-1(-1) | 18.22 | 929.0 | 1.96          | 5.656    | 651.4 | 0.87          |
| RSV       | 6.818 | 766.0 | 0.89          | 1.663    | 731.8 | 0.23          |
| HTLV      | 32.41 | 1773  | 1.83          | 7.368    | 1041  | 0.71          |
| MMTV      | 134.1 | 2664  | 5.03          | 33.45    | 1588  | 2.11          |
| HIV-2     | 15.24 | 1107  | 1.38          | 3.702    | 1057  | 0.35          |
| SIV       | 18.61 | 1181  | 1.58          | 7.65     | 1360  | 0.56          |
| SINV      | 12.97 | 368.4 | 3.52          | 3.622    | 405.6 | 0.89          |
| PEG10     | 98.22 | 1408  | 6.98          | 16.95    | 557.1 | 3.04          |
| CCR5      | 1.514 | 38.31 | 3.95          | 1.324    | 85.61 | 1.55          |

Luciferase activities were measured with the Dual-Luciferase Reporter Assay System. Fluc: Firefly luciferase; Rluc: Renilla luciferase.

**Table S3. Sequences of DNA primers. Related to STAR methods**

| oligos for:                         | oligo name              | target              | Sequence (5'-3')                                  |
|-------------------------------------|-------------------------|---------------------|---------------------------------------------------|
| qPCR                                | qFirefly luciferase-F   | Firefly luciferase  | CCAGGGATTTCAGTCGATGT                              |
|                                     | qFirefly luciferase-R   |                     | AATCTCACGCAGGCAGTTCT                              |
|                                     | qGag-Pol-F              | HIV-1               | AAAGGCACAGCAAGCAGCAG                              |
|                                     | qGag-Pol-R              | Gag-Pol             | ACCATTTGCCCTGGAGGTT                               |
|                                     | qGAPDH-F                | GAPDH               | TCGGAGTCAACGGATTTG                                |
|                                     | qGAPDH-R                |                     | GCATCGCCCCACTTGATT                                |
|                                     | qPelo-F                 | Pelo                | GACCGACAACAACTGCTCCTG                             |
|                                     | qPelo-R                 |                     | AGCCACAGTAGGGTCACAAAGG                            |
|                                     | qHBS1L-F                | HBS1L               | CGAGGATCCACTGTGTAAGAAG                            |
| qHBS1L-R                            | AGGGTAGGAAATCAGAGCATAAC |                     |                                                   |
| pDual-HIV2(-1) construction         | HIV-2-F                 | HIV-2               | CGGGGGTACCTGGTAAGCCAGGACACATC                     |
|                                     | HIV-2-R                 | -1PRF               | CGCGGATCCTGCTGTTGGTGTGACCCCC                      |
| pDual-SIV(-1) construction          | SIV-F                   | SIVmac              | CGGGGGTACCTGGAAAATGGACCATGTT                      |
|                                     | SIV-R                   | -1PRF               | CGCGGATCCAGCAGTTGGCATCAGCCCC                      |
| pDual-SINV(-1) construction         | SVNI-F                  | SVNI                | CGGGGGTACCGCGCTGCTGCTCCTGCT                       |
|                                     | SVNI-R                  | -1PRF               | CGCGGATCCATACGGTATCTGTGGCAC                       |
| pDual-PEG10(-1) construction        | PEG10-F                 | PEG10               | GTTGGTACCAGGTCCTACGCTGACA                         |
|                                     | PEG10-R                 | -1PRF               | TTGGATCCAGGCATCATCTTGTGGGGA                       |
| pDual-CCR5(-1) construction         | CCR5-F                  | CCR5                | GGGGTACCCCTCCTGACAATCGATA                         |
|                                     | CCR5-R                  | -1PRF               | ATGGATCCTGGAAAATGAGAGCTGCA                        |
| pCMV-PMT construction               | PMT-F                   | Truncated HIV-1 Gag | AGGATCCGCCACCATGGGTGCGAGAGCGT<br>CG               |
|                                     | PMT-R                   |                     | AGAATTCTCAAAAATTAGCCTGTCTCTCAG                    |
| pMD19-T7-PRF construction           | PRF-F                   | HIV-1 -1PRF         | <u>TAATACGACTCACTATAGGGGACACCAAAT</u><br>GAAAGATT |
|                                     | PRF-R                   |                     | <u>GAATTC</u> CACGCGTGAAGAAAATTC                  |
| pSuper-retro-MMT V(-1) construction | MMTV-F                  | MMTV                | GGAAGATCTGGTACCTCCTCCCTGG                         |
|                                     | MMTV-R                  | -1PRF               | CCCAAGCTTAAAATAGGATCTCTG                          |
